# Supplementary material for: Formation of sandwich and multidecker complexes between O2 and alkali/alkaline earth metals: a DFT study
Source: Royal Society of Chemistry journal article supplement (doi:10.1039/d2nj00442a), 2022-01-01

**Electronic Supplementary Information**

**Table S1:** Solvent phase stabilization energy (in kcal mol<sup>-1</sup>) in different solvents (single point calculations) obtained at the B3LYP/6-31++G(d,p) level of theory

| System                 | SE (Carbon Tetrachloride)<br>ε = 2.2 | SE (Ethanol)<br>ε = 24.3 | SE (Acetonitrile)<br>ε = 37.5 | SE(DMSO)<br>ε = 46.7 | SE (Water)<br>ε = 80.4 |
|------------------------|--------------------------------------|--------------------------|-------------------------------|----------------------|------------------------|
| 1-O <sub>2</sub> -1-Li | 104.74                               | 114.68                   | 115.05                        | 115.25               | 115.51                 |
| 1-O <sub>2</sub> -1-Na | 86.17                                | 100.43                   | 100.93                        | 101.21               | 101.57                 |
| 1-O <sub>2</sub> -1-K  | 87.48                                | 100.33                   | 100.77                        | 101.02               | 101.33                 |
| 1-O <sub>2</sub> -1-Be | 118.09                               | 135.97                   | 136.67                        | 137.07               | 137.58                 |
| 1-O <sub>2</sub> -1-Mg | 56.59                                | 98.00                    | 99.57                         | 100.44               | 101.57                 |
| 1-O <sub>2</sub> -1-Ca | 76.98                                | 125.96                   | 127.76                        | 128.74               | 130.03                 |
| 2-O <sub>2</sub> -1-Li | 111.04                               | 111.45                   | 111.52                        | 111.56               | 111.61                 |
| 2-O <sub>2</sub> -1-Na | 94.85                                | 100.61                   | 100.84                        | 100.98               | 101.15                 |
| 2-O <sub>2</sub> -1-K  | 96.61                                | 102.25                   | 102.46                        | 102.58               | 102.73                 |
| 2-O <sub>2</sub> -1-Be | 168.31                               | 168.63                   | 168.66                        | 168.68               | 168.70                 |
| 2-O <sub>2</sub> -1-Mg | 111.51                               | 123.71                   | 124.26                        | 124.56               | 124.96                 |
| 2-O <sub>2</sub> -1-Ca | 136.08                               | 155.30                   | 156.08                        | 156.51               | 157.07                 |
| 3-O <sub>2</sub> -2-Li | 207.95                               | 204.58                   | 204.52                        | 204.49               | 204.45                 |
| 3-O <sub>2</sub> -2-Na | 170.41                               | 176.89                   | 177.16                        | 177.31               | 177.51                 |
| 3-O <sub>2</sub> -2-K  | 169.74                               | 176.94                   | 177.21                        | 177.36               | 177.56                 |
| 3-O <sub>2</sub> -2-Be | 358.37                               | 358.50                   | 358.55                        | 358.57               | 358.61                 |
| 3-O <sub>2</sub> -2-Mg | 251.89                               | 267.79                   | 268.49                        | 268.87               | 269.38                 |
| 3-O <sub>2</sub> -2-Ca | 291.06                               | 315.92                   | 316.92                        | 317.48               | 318.21                 |
| 4-O <sub>2</sub> -3-Li | 392.26                               | 392.05                   | 392.00                        | 391.97               | 391.94                 |
| 4-O <sub>2</sub> -3-Na | 340.10                               | 350.05                   | 350.54                        | 350.82               | 351.20                 |
| 4-O <sub>2</sub> -3-K  | 339.58                               | 348.07                   | 348.41                        | 346.74               | 350.43                 |
| 4-O <sub>2</sub> -3-Be | 555.61                               | 555.35                   | 555.40                        | 555.42               | 555.46                 |
| 4-O <sub>2</sub> -3-Mg | 394.85                               | 413.22                   | 414.03                        | 414.47               | 415.06                 |
| 4-O <sub>2</sub> -3-Ca | 447.36                               | 477.08                   | 478.28                        | 478.94               | 479.82                 |
| 5-O <sub>2</sub> -4-Li | 422.42                               | 413.53                   | 413.32                        | 413.20               | 413.05                 |
| 5-O <sub>2</sub> -4-Na | 344.36                               | 353.31                   | 353.69                        | 353.90               | 354.18                 |
| 5-O <sub>2</sub> -4-K  | 339.12                               | 349.93                   | 350.34                        | 350.57               | 350.86                 |
| 5-O <sub>2</sub> -4-Be | 753.80                               | 752.91                   | 752.95                        | 752.97               | 753.00                 |
| 5-O <sub>2</sub> -4-Mg | 539.18                               | 561.63                   | 562.61                        | 563.16               | 563.88                 |
| 5-O <sub>2</sub> -4-Ca | 604.23                               | 639.57                   | 641.00                        | 641.78               | 642.81                 |
| 6-O <sub>2</sub> -5-Li | 649.00                               | 634.36                   | 639.23                        | 639.14               | 633.88                 |
| 6-O <sub>2</sub> -5-Na | 557.37                               | 567.89                   | 568.35                        | 568.61               | 568.95                 |
| 6-O <sub>2</sub> -5-K  | 558.20                               | 568.40                   | 565.99                        | 566.24               | 566.58                 |
| 6-O <sub>2</sub> -5-Be | 952.26                               | 950.58                   | 950.59                        | 950.60               | 950.62                 |
| 6-O <sub>2</sub> -5-Mg | 682.63                               | 707.22                   | 708.31                        | 708.92               | 709.71                 |
| 6-O <sub>2</sub> -5-Ca | 760.85                               | 801.29                   | 802.93                        | 803.83               | 805.01                 |

**TABLE S2** Wave length of transitions, ΔE values {E<sub>HOMO</sub>(Complex)– E<sub>HOMO</sub>(O<sub>2</sub>)}, oscillator strengths, major MOs involved in the transition and contribution of the MOs. (obtained at CAM-B3LYP/6-31++G (d,p) level of theory).

| System                 | Wavelength<br>(in nm) | ΔE<br>(in au) | Oscillator<br>Strength | Contributing<br>MO | Expansion<br>Co-efficient |
|------------------------|-----------------------|---------------|------------------------|--------------------|---------------------------|
| 1-O <sub>2</sub> -1-Li | 350.02                | 0.0524        | 0.0067                 | HOMO→LUMO          | 0.94372                   |
| 1-O <sub>2</sub> -1-Na | 476.73                | 0.0988        | 0.0043                 | HOMO→LUMO          | 0.96014                   |
| 1-O <sub>2</sub> -1-K  | 477.88                | 0.1234        | 0.0014                 | HOMO→LUMO          | 0.94384                   |
| 1-O <sub>2</sub> -1-Be | 309.77                | 0.0406        | 0.0067                 | HOMO-1→LUMO        | 0.69802                   |
| 1-O <sub>2</sub> -1-Mg | 404.81                | 0.0935        | 0.0122                 | HOMO-2→LUMO        | 0.25584                   |
| 1-O <sub>2</sub> -1-Ca | 573.53                | 0.1521        | 0.0095                 | HOMO-2→LUMO        | 0.10365                   |

**TABLE S3** Wave length of transitions, oscillator strengths, major MOs involved in the transition and contribution of the MOs compared with Li in all systems (obtained at CAM-B3LYP/6-31++G (d,p) level of theory).

| System                 | Wavelength<br>(In nm) | Oscillator<br>Strength | Contributing<br>MO | Expansion Co-<br>Efficient |
|------------------------|-----------------------|------------------------|--------------------|----------------------------|
| 1-O <sub>2</sub> -1-Li | 350.02                | 0.0666                 | HOMO→LUMO          | 0.89997                    |
| 2-O <sub>2</sub> -1-Li | 154.21                | 0.0449                 | HOMO→LUMO          | 0.42705                    |
| 3-O <sub>2</sub> -2-Li | 176.72                | 0.0182                 | HOMO→LUMO+4        | 0.11783                    |
| 4-O <sub>2</sub> -3-Li | 281.63                | 0.0001                 | HOMO→LUMO+2        | 0.97025                    |
| 5-O <sub>2</sub> -4-Li | 243.13                | 0.0000                 | HOMO→LUMO+4        | 0.47662                    |
| 6-O <sub>2</sub> -5-Li | 254.45                | 0.0012                 | HOMO→LUMO+4        | 0.97302                    |

**Fig. S1** Dispersal of  $\pi$ - electron cloud in the benzene ring against a concentrated electron cloud in O<sub>2</sub> molecule

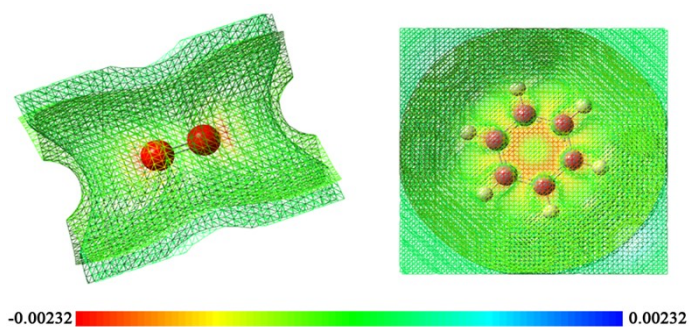

Supplement: d2nj00442a1.pdf [file d2nj00442a1.pdf]
